# Supplementary material
Source: publisher site journal article supplement (https://www.degruyterbrill.com/publication/isbn/9783050050102/downloadAsset/9783050050102_Buchinformation.pdf)
Supplement: Supplementary file 1 [file 9783050050102_Buchinformation.pdf]

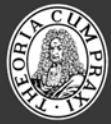

# Akademie Verlag

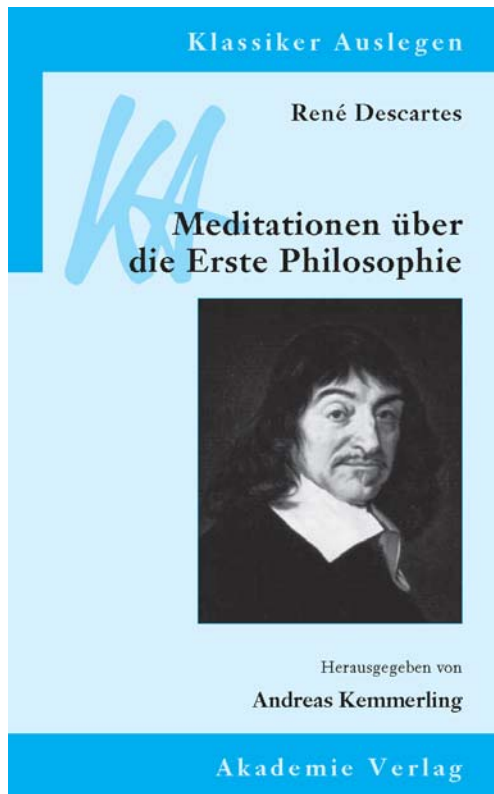

## René Descartes: Meditationen über die Erste Philosophie

Herausgegeben von Andreas Kemmerling  
*Klassiker Auslegen*, Band 37

2009. VIII, 230 Seiten, 130 x 210 mm,  
Broschur, € 19,80  
ISBN 978-3-05-004352-4

Mit seinen sechs *Meditationen* unternimmt Descartes den Versuch, der neuzeitlichen Wissenschaft eine geeignete metaphysische Fundierung zu geben. Die auf Aristoteles basierende Schulphilosophie seiner Zeit hielt er in zentralen Punkten für falsch. Schlimmer noch: Da scholastische Lehren tief in die Theologien jener Zeit eingewoben waren, waren sie auch ein Hindernis des wissenschaftlichen Fortschritts und eine Bedrohung freien Forschens. Dies war Descartes seit der Verurteilung Galileis und der Verbrennung seiner Schriften im Jahre 1633 klar. Es bedurfte einer neuen Metaphysik, die in der Lage war, die neue Wissenschaft zu fundieren, ohne den christlichen Glauben in Frage zu stellen. Im Herbst 1639 begann er mit der Arbeit an diesem Werk. Ein halbes Jahr später war es abgeschlossen. Es erschien schließlich im Sommer 1641, erweitert um eine Reihe von Einwänden anderer Gelehrter und seine eigenen Er widerungen auf sie.

Die *Meditationen* sind ohne Zweifel ein Meilenstein und ein Meisterwerk der abendländischen Philosophie. Durch sie wurde Descartes zum 'Vater der modernen Philosophie' - und die Erkenntnistheorie auf Jahrhunderte zur Fundamentaldisziplin der Philosophie. Bis heute eignet sich kein klassisches Werk besser dazu, in der Auseinandersetzung mit den Argumentationsgängen eines Klassikers selbst zu erfahren, was philosophisches Denken ist – und wie es geht. Die neun Kapitel dieses Kommentars sind Originalbeiträge. Sie sollen Studierende und Dozenten bei der Lektüre begleiten und dazu beitragen, das intellektuelle Vergnügen an der Tiefe (und auch Schönheit) der *Meditationen* noch zu steigern.

Mit Beiträgen von Lilli Alanen, Gary Hatfield, Andreas Hüttemann, Andreas Kemmerling, Tobias Rosefeldt, Andreas Schmidt und Hans-Peter Schütt.
